# Supplementary material for: Sesame Lignans Suppress Age-Related Cognitive Decline in Senescence-Accelerated Mice
Source: PubMed Central journal article supplement (PMC6682928; doi:10.3390/nu11071582), 2019-07-12
Supplement: nutrients-11-01582-s001.pdf [file nutrients-11-01582-s001.pdf]

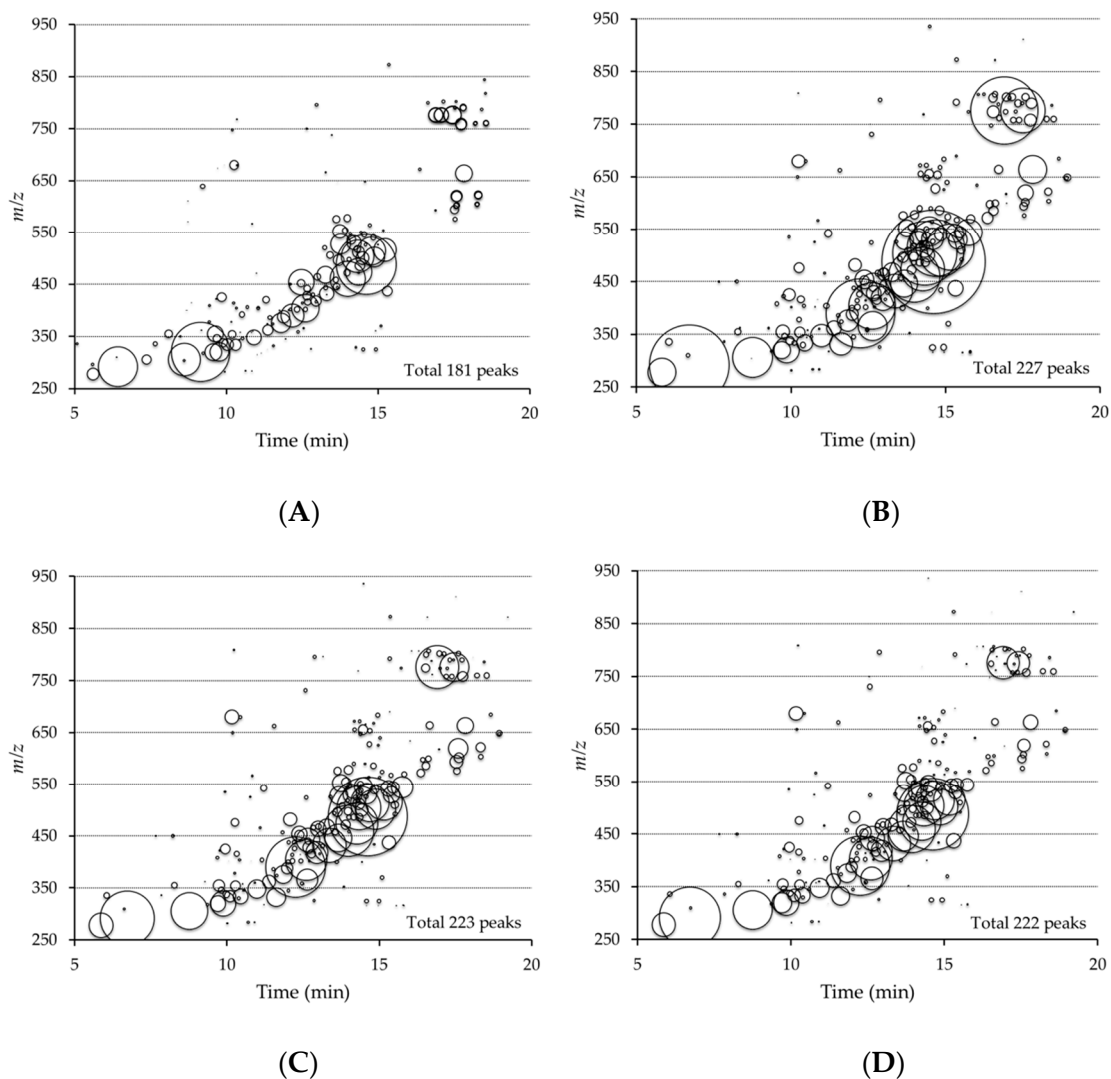

**Figure S1.** Reactive carbonyl species (RC) maps of livers obtained from SAMP10 mice in the (A) young control, fed basal diet (YC), (B) old control, fed basal diet (OC), (C) old, fed basal diet supplemented with 0.02% sesame lignans (OS0.02), (D) old, fed diet supplemented with 0.05% sesame lignans (OS0.05). The area of each circle represents the intensity of the RCs relative to an internal standard. RC maps are presented as averages of each map ( $n = 5$ ).

**Table S1.** Reactive carbonyl species (RCs) in cerebral cortices

| Compound                 | YC                            | OC                            | OS0.02                        | OS0.05                         |
|--------------------------|-------------------------------|-------------------------------|-------------------------------|--------------------------------|
| Formaldehyde             | 11768.7 ± 1493.6 <sup>a</sup> | 19710.7 ± 4169.5 <sup>a</sup> | 13566.0 ± 1195.7 <sup>a</sup> | 18539.7 ± 7715.6 <sup>a</sup>  |
| Acetaldehyde             | 536.4 ± 479.9 <sup>a</sup>    | 6817.8 ± 1297.9 <sup>b</sup>  | 3691.0 ± 341.3 <sup>ab</sup>  | 5199.9 ± 1452.5 <sup>b</sup>   |
| Acrolein                 | 767.5 ± 166.8 <sup>a</sup>    | 515.5 ± 95.9 <sup>a</sup>     | 0.0 ± 0.0 <sup>b</sup>        | 47.5 ± 47.5 <sup>b</sup>       |
| Propanal                 | 7136.7 ± 1261.8 <sup>a</sup>  | 30567.6 ± 2183.8 <sup>b</sup> | 21438.0 ± 1069.1 <sup>c</sup> | 25697.2 ± 2574.4 <sup>bc</sup> |
| Crotonaldehyde           | 29.2 ± 5.7 <sup>a</sup>       | 100.2 ± 4.5 <sup>b</sup>      | 81.3 ± 4.6 <sup>b</sup>       | 84.2 ± 6.4 <sup>b</sup>        |
| Butanal                  | 186.6 ± 160.3 <sup>a</sup>    | 10149.8 ± 688.8 <sup>b</sup>  | 3704.6 ± 546.2 <sup>c</sup>   | 4245.1 ± 1165.0 <sup>c</sup>   |
| Pentanal                 | 102.3 ± 102.3 <sup>a</sup>    | 1201.4 ± 95.4 <sup>b</sup>    | 890.2 ± 101.0 <sup>b</sup>    | 838.3 ± 137.6 <sup>b</sup>     |
| 2,4-Hexadienal           | 21.0 ± 1.6 <sup>a</sup>       | 0.0 ± 0.0 <sup>b</sup>        | 0.0 ± 0.0 <sup>b</sup>        | 0.0 ± 0.0 <sup>b</sup>         |
| 2-Hexenal                | 86.0 ± 6.5 <sup>a</sup>       | 207.1 ± 3.4 <sup>b</sup>      | 157.0 ± 6.5 <sup>c</sup>      | 168.8 ± 14.8 <sup>c</sup>      |
| Hexanal                  | 7910.9 ± 526.9 <sup>a</sup>   | 37065.0 ± 465.6 <sup>b</sup>  | 24379.0 ± 1867.8 <sup>c</sup> | 25749.4 ± 3863.7 <sup>c</sup>  |
| 2,4-Heptadienal          | 7.1 ± 2.0 <sup>a</sup>        | 0.0 ± 0.0 <sup>b</sup>        | 0.0 ± 0.0 <sup>b</sup>        | 0.0 ± 0.0 <sup>b</sup>         |
| 2-Heptenal               | 21.0 ± 1.9 <sup>a</sup>       | 50.7 ± 2.8 <sup>b</sup>       | 38.0 ± 2.8 <sup>c</sup>       | 37.2 ± 2.2 <sup>c</sup>        |
| HHE                      | 253.1 ± 28.4 <sup>a</sup>     | 1112.3 ± 40.8 <sup>b</sup>    | 667.8 ± 24.0 <sup>c</sup>     | 783.5 ± 133.0 <sup>c</sup>     |
| Heptanal                 | 1175.9 ± 106.4 <sup>a</sup>   | 420.9 ± 61.8 <sup>b</sup>     | 300.9 ± 19.3 <sup>b</sup>     | 345.8 ± 33.9 <sup>b</sup>      |
| 2-Octenal                | 9.9 ± 0.8 <sup>a</sup>        | 20.5 ± 1.1 <sup>a</sup>       | 16.7 ± 1.4 <sup>a</sup>       | 19.4 ± 7.4 <sup>a</sup>        |
| Octanal                  | 5516.1 ± 403.0 <sup>a</sup>   | 1347.5 ± 236.5 <sup>b</sup>   | 1127.2 ± 74.3 <sup>b</sup>    | 1340.6 ± 202.9 <sup>b</sup>    |
| 2,4-Nonadienal           | 119.6 ± 5.0 <sup>a</sup>      | 0.0 ± 0.0 <sup>b</sup>        | 0.0 ± 0.0 <sup>b</sup>        | 0.0 ± 0.0 <sup>b</sup>         |
| 2-Nonenal                | 112.8 ± 3.2 <sup>a</sup>      | 113.3 ± 11.5 <sup>a</sup>     | 87.6 ± 4.4 <sup>a</sup>       | 88.6 ± 8.2 <sup>a</sup>        |
| Nonanal                  | 6211.1 ± 362.8 <sup>a</sup>   | 6783.1 ± 996.3 <sup>a</sup>   | 5201.0 ± 468.9 <sup>a</sup>   | 6529.5 ± 988.9 <sup>a</sup>    |
| 2,4-Decadienal           | 21.0 ± 2.8 <sup>a</sup>       | 174.9 ± 7.3 <sup>b</sup>      | 109.3 ± 12.9 <sup>c</sup>     | 104.4 ± 21.3 <sup>c</sup>      |
| HNE                      | 180.3 ± 20.9 <sup>a</sup>     | 429.9 ± 30.1 <sup>b</sup>     | 293.6 ± 9.2 <sup>c</sup>      | 313.9 ± 35.5 <sup>c</sup>      |
| Decanal                  | 2310.1 ± 92.8 <sup>a</sup>    | 2090.7 ± 308.3 <sup>a</sup>   | 1635.1 ± 118.3 <sup>a</sup>   | 1744.6 ± 242.3 <sup>a</sup>    |
| EDE                      | 511.5 ± 61.4 <sup>a</sup>     | 1215.6 ± 135.1 <sup>b</sup>   | 749.0 ± 53.7 <sup>ac</sup>    | 1124.5 ± 130.5 <sup>bc</sup>   |
| 2-Undecenal              | 33.1 ± 4.0 <sup>a</sup>       | 32.6 ± 3.6 <sup>a</sup>       | 21.1 ± 1.8 <sup>ab</sup>      | 19.8 ± 2.7 <sup>b</sup>        |
| Undecanal                | 377.2 ± 53.9 <sup>a</sup>     | 431.8 ± 96.8 <sup>a</sup>     | 280.9 ± 32.0 <sup>a</sup>     | 328.1 ± 91.2 <sup>a</sup>      |
| Dodecanal                | 983.5 ± 183.0 <sup>a</sup>    | 1476.7 ± 243.3 <sup>a</sup>   | 1024.8 ± 145.3 <sup>a</sup>   | 1089.2 ± 226.7 <sup>a</sup>    |
| Tridecanal               | 393.6 ± 222.5 <sup>a</sup>    | 599.2 ± 243.2 <sup>a</sup>    | 136.3 ± 117.1 <sup>a</sup>    | 296.1 ± 226.1 <sup>a</sup>     |
| Pentadecanal             | 1282.4 ± 448.4 <sup>a</sup>   | 5823.3 ± 870.9 <sup>b</sup>   | 3997.1 ± 323.0 <sup>b</sup>   | 4421.5 ± 268.0 <sup>b</sup>    |
| Hexadecanal              | 2521.4 ± 342.2 <sup>a</sup>   | 4763.6 ± 467.4 <sup>b</sup>   | 3831.6 ± 366.2 <sup>ab</sup>  | 4454.4 ± 438.3 <sup>b</sup>    |
| 8,11,14-Heptadecatrienal | 225.1 ± 65.3 <sup>a</sup>     | 289.4 ± 23.5 <sup>a</sup>     | 242.3 ± 15.0 <sup>a</sup>     | 207.0 ± 28.6 <sup>a</sup>      |
| 8,11-Heptadecadienal     | 46.6 ± 8.7 <sup>a</sup>       | 133.2 ± 19.4 <sup>b</sup>     | 91.7 ± 8.5 <sup>ab</sup>      | 97.3 ± 20.3 <sup>ab</sup>      |
| 8-Heptadecenal           | 934.6 ± 67.9 <sup>a</sup>     | 2438.3 ± 188.2 <sup>b</sup>   | 2098.3 ± 69.7 <sup>b</sup>    | 1997.8 ± 152.4 <sup>b</sup>    |
| Heptadecanal             | 201.8 ± 101.2 <sup>a</sup>    | 1729.1 ± 334.5 <sup>b</sup>   | 1177.4 ± 139.1 <sup>b</sup>   | 1280.1 ± 147.5 <sup>b</sup>    |
| Octadecanal              | 759.0 ± 503.9 <sup>a</sup>    | 2325.3 ± 875.0 <sup>a</sup>   | 1564.7 ± 389.5 <sup>a</sup>   | 2013.5 ± 751.4 <sup>a</sup>    |
| Secosterol-A             | 15.5 ± 0.7 <sup>a</sup>       | 54.7 ± 2.9 <sup>b</sup>       | 39.5 ± 4.1 <sup>c</sup>       | 43.2 ± 4.4 <sup>bc</sup>       |
| Secosterol-B             | 1.4 ± 0.8 <sup>a</sup>        | 12.3 ± 1.0 <sup>b</sup>       | 8.6 ± 3.5 <sup>ab</sup>       | 8.3 ± 2.0 <sup>ab</sup>        |

Values are the mean ± SEM (pmol/g wet tissue,  $n = 5$ ). Statistical analyses were performed using a one-way ANOVA followed by a Tukey-Kramer post hoc analysis. Different letters indicate significant differences ( $p < 0.05$ ). Experimental groups are indicated as follows: Young control, fed basal diet (YC), old control, fed basal diet (OC), old, fed basal diet supplemented with 0.02% sesame lignans (OS0.02), and old, fed diet supplemented with 0.05% sesame lignans (OS0.05). HHE: 4-hydroxy-2-hexenal, HNE: 4-hydroxy-2-nonenal, EDE: 4,5-epoxy-2-decenal.

**Table S2.** Reactive carbonyl species (RCs) in livers

| Compound                 | YC                            | OC                             | OS0.02                         | OS0.05                         |
|--------------------------|-------------------------------|--------------------------------|--------------------------------|--------------------------------|
| Formaldehyde             | 10074.1 ± 4278.8 <sup>a</sup> | 38671.6 ± 5328.9 <sup>b</sup>  | 27755.0 ± 3336.1 <sup>b</sup>  | 22204.2 ± 2914.9 <sup>ab</sup> |
| Acetaldehyde             | 7084.6 ± 1736.5 <sup>a</sup>  | 30945.4 ± 10660.9 <sup>b</sup> | 15955.8 ± 2875.3 <sup>ab</sup> | 15466.9 ± 2027.7 <sup>ab</sup> |
| Acrolein                 | 518.0 ± 166.4 <sup>a</sup>    | 139.1 ± 101.8 <sup>ab</sup>    | 0.0 ± 0.0 <sup>b</sup>         | 0.0 ± 0.0 <sup>b</sup>         |
| Glyoxal                  | 1464.1 ± 534.1 <sup>a</sup>   | 185.7 ± 161.8 <sup>a</sup>     | 760.8 ± 237.2 <sup>a</sup>     | 393.7 ± 253.7 <sup>a</sup>     |
| Propanal                 | 13249.4 ± 2018.1 <sup>a</sup> | 22043.3 ± 1706.8 <sup>b</sup>  | 17978.9 ± 1923.9 <sup>ab</sup> | 18052.7 ± 1969.4 <sup>ab</sup> |
| Crotonaldehyde           | 151.0 ± 17.7 <sup>a</sup>     | 131.9 ± 15.0 <sup>a</sup>      | 144.5 ± 5.5 <sup>a</sup>       | 157.2 ± 17.9 <sup>a</sup>      |
| Butanal                  | 2473.6 ± 811.3 <sup>a</sup>   | 6660.9 ± 425.2 <sup>b</sup>    | 6112.1 ± 812.3 <sup>bc</sup>   | 3908.3 ± 520.9 <sup>ac</sup>   |
| Pentanal                 | 984.6 ± 170.6 <sup>a</sup>    | 2069.3 ± 134.3 <sup>b</sup>    | 1596.3 ± 141.3 <sup>ab</sup>   | 1278.6 ± 205.3 <sup>a</sup>    |
| 2,4-Hexadienal           | 29.5 ± 5.7 <sup>a</sup>       | 19.6 ± 3.2 <sup>ab</sup>       | 16.1 ± 0.5 <sup>ab</sup>       | 12.6 ± 1.6 <sup>b</sup>        |
| 2-Hexenal                | 37.6 ± 4.5 <sup>a</sup>       | 43.3 ± 6.5 <sup>a</sup>        | 35.5 ± 1.8 <sup>a</sup>        | 34.3 ± 4.0 <sup>a</sup>        |
| Hexanal                  | 3394.8 ± 383.0 <sup>a</sup>   | 7302.2 ± 363.4 <sup>b</sup>    | 4457.4 ± 228.4 <sup>a</sup>    | 4534.3 ± 508.8 <sup>a</sup>    |
| 2,4-Heptadienal          | 6.7 ± 2.4 <sup>a</sup>        | 7.9 ± 2.2 <sup>a</sup>         | 7.1 ± 1.3 <sup>a</sup>         | 4.4 ± 1.4 <sup>a</sup>         |
| 2-Heptenal               | 31.0 ± 7.3 <sup>a</sup>       | 65.3 ± 7.6 <sup>b</sup>        | 46.9 ± 3.5 <sup>ab</sup>       | 40.1 ± 3.6 <sup>a</sup>        |
| HHE                      | 31.8 ± 3.6 <sup>a</sup>       | 1839.6 ± 434.5 <sup>b</sup>    | 774.6 ± 149.9 <sup>a</sup>     | 743.2 ± 232.9 <sup>a</sup>     |
| Heptanal                 | 735.3 ± 125.3 <sup>a</sup>    | 650.5 ± 37.7 <sup>ab</sup>     | 549.8 ± 35.8 <sup>ab</sup>     | 429.2 ± 48.9 <sup>b</sup>      |
| 2-Octenal                | 16.0 ± 1.0 <sup>a</sup>       | 32.4 ± 6.5 <sup>b</sup>        | 18.3 ± 2.6 <sup>ab</sup>       | 12.6 ± 2.3 <sup>a</sup>        |
| Octanal                  | 3327.6 ± 635.0 <sup>a</sup>   | 2456.2 ± 247.9 <sup>ab</sup>   | 2100.7 ± 178.9 <sup>ab</sup>   | 1545.3 ± 193.4 <sup>b</sup>    |
| 2,4-Nonadienal           | 66.0 ± 10.6 <sup>a</sup>      | 1.0 ± 1.0 <sup>b</sup>         | 0.0 ± 0.0 <sup>b</sup>         | 1.6 ± 1.6 <sup>b</sup>         |
| 2-Nonenal                | 252.4 ± 24.0 <sup>ab</sup>    | 280.9 ± 13.2 <sup>b</sup>      | 254.5 ± 9.8 <sup>b</sup>       | 192.7 ± 9.3 <sup>a</sup>       |
| Nonanal                  | 5550.6 ± 983.4 <sup>a</sup>   | 10063.4 ± 920.2 <sup>b</sup>   | 8261.5 ± 555.3 <sup>ab</sup>   | 6288.1 ± 390.3 <sup>a</sup>    |
| 2,4-Decadienal           | 32.3 ± 2.8 <sup>a</sup>       | 105.3 ± 9.7 <sup>b</sup>       | 66.6 ± 10.1 <sup>c</sup>       | 64.3 ± 6.3 <sup>c</sup>        |
| HNE                      | 70.2 ± 1.5 <sup>a</sup>       | 111.0 ± 9.1 <sup>b</sup>       | 62.8 ± 5.6 <sup>a</sup>        | 69.4 ± 5.9 <sup>a</sup>        |
| Decanal                  | 1782.2 ± 351.3 <sup>a</sup>   | 3033.8 ± 233.5 <sup>b</sup>    | 2846.4 ± 219.0 <sup>ab</sup>   | 2143.2 ± 290.0 <sup>ab</sup>   |
| EDE                      | 165.0 ± 16.7 <sup>ab</sup>    | 328.2 ± 76.5 <sup>a</sup>      | 79.7 ± 37.6 <sup>b</sup>       | 81.4 ± 24.0 <sup>b</sup>       |
| 2-Undecenal              | 53.1 ± 7.4 <sup>a</sup>       | 49.6 ± 2.4 <sup>a</sup>        | 48.2 ± 1.9 <sup>a</sup>        | 41.7 ± 1.8 <sup>a</sup>        |
| Undecanal                | 495.8 ± 115.8 <sup>a</sup>    | 1108.6 ± 83.8 <sup>b</sup>     | 1097.6 ± 99.0 <sup>b</sup>     | 815.3 ± 112.8 <sup>ab</sup>    |
| Dodecanal                | 1130.5 ± 319.4 <sup>a</sup>   | 2797.2 ± 186.7 <sup>b</sup>    | 3000.9 ± 298.5 <sup>b</sup>    | 2382.2 ± 374.4 <sup>b</sup>    |
| Tridecanal               | 715.2 ± 387.4 <sup>a</sup>    | 1911.7 ± 196.3 <sup>ab</sup>   | 2128.0 ± 234.0 <sup>b</sup>    | 1749.6 ± 329.1 <sup>ab</sup>   |
| Tetradecanal             | 47.8 ± 46.8 <sup>a</sup>      | 659.4 ± 100.7 <sup>b</sup>     | 654.7 ± 68.5 <sup>b</sup>      | 415.3 ± 131.7 <sup>ab</sup>    |
| Pentadecanal             | 1205.4 ± 403.0 <sup>a</sup>   | 5238.0 ± 467.9 <sup>b</sup>    | 4706.6 ± 430.1 <sup>b</sup>    | 3599.4 ± 513.2 <sup>b</sup>    |
| Hexadecanal              | 2373.4 ± 423.5 <sup>a</sup>   | 10276.1 ± 730.9 <sup>b</sup>   | 5972.9 ± 389.8 <sup>c</sup>    | 5048.0 ± 744.5 <sup>c</sup>    |
| 8,11,14-Heptadecatrienal | 311.1 ± 53.6 <sup>a</sup>     | 488.4 ± 125.8 <sup>a</sup>     | 288.0 ± 66.7 <sup>a</sup>      | 180.3 ± 46.8 <sup>a</sup>      |
| 8,11-Heptadecadienal     | 65.6 ± 20.2 <sup>a</sup>      | 307.4 ± 26.5 <sup>b</sup>      | 256.5 ± 10.4 <sup>b</sup>      | 239.5 ± 19.2 <sup>b</sup>      |
| 8-Heptadecenal           | 221.1 ± 35.8 <sup>a</sup>     | 260.4 ± 16.4 <sup>a</sup>      | 206.1 ± 13.0 <sup>a</sup>      | 232.9 ± 21.3 <sup>a</sup>      |
| Heptadecanal             | 104.7 ± 71.8 <sup>a</sup>     | 1209.6 ± 122.8 <sup>b</sup>    | 1006.9 ± 68.3 <sup>bc</sup>    | 691.3 ± 148.4 <sup>c</sup>     |
| Octadecanal              | 406.4 ± 191.9 <sup>a</sup>    | 2699.1 ± 268.9 <sup>b</sup>    | 1727.3 ± 182.3 <sup>c</sup>    | 1071.2 ± 239.6 <sup>ac</sup>   |
| Secosterol-A             | 12.0 ± 4.1 <sup>a</sup>       | 105.2 ± 28.4 <sup>b</sup>      | 47.6 ± 12.0 <sup>ab</sup>      | 36.8 ± 14.7 <sup>ab</sup>      |
| Secosterol-B             | 0.5 ± 0.4 <sup>a</sup>        | 31.4 ± 10.7 <sup>b</sup>       | 12.9 ± 5.4 <sup>ab</sup>       | 8.1 ± 3.8 <sup>ab</sup>        |

Values are the mean ± SEM (pmol/g wet tissue,  $n = 5$ ). Statistical analyses were performed using a one-way ANOVA followed by a Tukey-Kramer post hoc analysis. Different letters indicate significant differences ( $p < 0.05$ ). Experimental groups are indicated as follows: Young control, fed basal diet (YC), old control, fed basal diet (OC), old, fed basal diet supplemented with 0.02% sesame lignans (OS0.02), and old, fed diet supplemented with 0.05% sesame lignans (OS0.05). HHE: 4-hydroxy-2-hexenal, HNE: 4-hydroxy-2-nonenal, EDE: 4,5-epoxy-2-decenal.
